# Supplementary material for: Progression of prostate carcinoma is promoted by adipose stromal cell-secreted CXCL12 signaling in prostate epithelium
Source: PubMed Central journal article supplement (PMC7985375; doi:10.1038/s41698-021-00160-9), 2021-03-22
Supplement: 41698_2021_160_MOESM2_ESM.pdf [file 41698_2021_160_MOESM2_ESM.pdf]

## Reporting Summary

Nature Research wishes to improve the reproducibility of the work that we publish. This form provides structure for consistency and transparency in reporting. For further information on Nature Research policies, see our [Editorial Policies](#) and the [Editorial Policy Checklist](#).

### Statistics

For all statistical analyses, confirm that the following items are present in the figure legend, table legend, main text, or Methods section.

n/a Confirmed

- The exact sample size ( $n$ ) for each experimental group/condition, given as a discrete number and unit of measurement
- A statement on whether measurements were taken from distinct samples or whether the same sample was measured repeatedly
- The statistical test(s) used AND whether they are one- or two-sided  
*Only common tests should be described solely by name; describe more complex techniques in the Methods section.*
- A description of all covariates tested
- A description of any assumptions or corrections, such as tests of normality and adjustment for multiple comparisons
- A full description of the statistical parameters including central tendency (e.g. means) or other basic estimates (e.g. regression coefficient) AND variation (e.g. standard deviation) or associated estimates of uncertainty (e.g. confidence intervals)
- For null hypothesis testing, the test statistic (e.g.  $F$ ,  $t$ ,  $r$ ) with confidence intervals, effect sizes, degrees of freedom and  $P$  value noted  
*Give  $P$  values as exact values whenever suitable.*
- For Bayesian analysis, information on the choice of priors and Markov chain Monte Carlo settings
- For hierarchical and complex designs, identification of the appropriate level for tests and full reporting of outcomes
- Estimates of effect sizes (e.g. Cohen's  $d$ , Pearson's  $r$ ), indicating how they were calculated

*Our web collection on [statistics for biologists](#) contains articles on many of the points above.*

### Software and code

Policy information about [availability of computer code](#)

Data collection No software was used

Data analysis Microsoft Excel 16.16.26; Graphpad Prism 7.05/e; ZEN2 Core; ImageJ / Java 1.8.0\_172; Amira v2020.2; Quantstudio 3; STAR v2.1.3; Cell Ranger v.3.1.0; Seurat v3.1.1 (R package); R Programming (3.5.2).

For manuscripts utilizing custom algorithms or software that are central to the research but not yet described in published literature, software must be made available to editors and reviewers. We strongly encourage code deposition in a community repository (e.g. GitHub). See the Nature Research [guidelines for submitting code & software](#) for further information.

### Data

Policy information about [availability of data](#)

All manuscripts must include a [data availability statement](#). This statement should provide the following information, where applicable:

- Accession codes, unique identifiers, or web links for publicly available datasets
- A list of figures that have associated raw data
- A description of any restrictions on data availability

Single cell RNA sequencing GEO deposition: GSE163701. Other data that support the findings of this study are available from the corresponding author upon request. There are no restrictions on data availability.

## Field-specific reporting

Please select the one below that is the best fit for your research. If you are not sure, read the appropriate sections before making your selection.

Life sciences       Behavioural & social sciences       Ecological, evolutionary & environmental sciences

For a reference copy of the document with all sections, see [nature.com/documents/nr-reporting-summary-flat.pdf](https://www.nature.com/documents/nr-reporting-summary-flat.pdf)

## Life sciences study design

All studies must disclose on these points even when the disclosure is negative.

|                 |                                                                                                                                                                                                                                                              |
|-----------------|--------------------------------------------------------------------------------------------------------------------------------------------------------------------------------------------------------------------------------------------------------------|
| Sample size     | For animal experiments, N=5 mice (or more) / group with experiments repeated twice with similar result is what we adhered to for experiments done in main display items. These numbers are standard in mouse research in this field / with the methods used. |
| Data exclusions | There were no data exclusions.                                                                                                                                                                                                                               |
| Replication     | Animal experiments were repeated at least twice with similar result                                                                                                                                                                                          |
| Randomization   | Allocation was random.                                                                                                                                                                                                                                       |
| Blinding        | Investigators analyzing the data were blinded to data allocation performed by another investigator.                                                                                                                                                          |

## Reporting for specific materials, systems and methods

We require information from authors about some types of materials, experimental systems and methods used in many studies. Here, indicate whether each material, system or method listed is relevant to your study. If you are not sure if a list item applies to your research, read the appropriate section before selecting a response.

### Materials & experimental systems

|                                     |                                                                 |
|-------------------------------------|-----------------------------------------------------------------|
| n/a                                 | Involved in the study                                           |
| <input type="checkbox"/>            | <input checked="" type="checkbox"/> Antibodies                  |
| <input type="checkbox"/>            | <input checked="" type="checkbox"/> Eukaryotic cell lines       |
| <input checked="" type="checkbox"/> | <input type="checkbox"/> Palaeontology and archaeology          |
| <input type="checkbox"/>            | <input checked="" type="checkbox"/> Animals and other organisms |
| <input type="checkbox"/>            | <input checked="" type="checkbox"/> Human research participants |
| <input type="checkbox"/>            | <input checked="" type="checkbox"/> Clinical data               |
| <input checked="" type="checkbox"/> | <input type="checkbox"/> Dual use research of concern           |

### Methods

|                                     |                                                 |
|-------------------------------------|-------------------------------------------------|
| n/a                                 | Involved in the study                           |
| <input checked="" type="checkbox"/> | <input type="checkbox"/> ChIP-seq               |
| <input checked="" type="checkbox"/> | <input type="checkbox"/> Flow cytometry         |
| <input checked="" type="checkbox"/> | <input type="checkbox"/> MRI-based neuroimaging |

## Antibodies

|                 |                                                                                                                                                                                                                                                 |
|-----------------|-------------------------------------------------------------------------------------------------------------------------------------------------------------------------------------------------------------------------------------------------|
| Antibodies used | Anti-E-cadherin R&D AF748; anti-N-Cadherin Abcam ab98952 ; anti-CXCL12 sc-28876; anti-fibronectin ab23750; anti-Ki67 RM-9106-S0, 14-5698 and Cell Signaling 9129 ; anti-PDGFR $\alpha$ ab51875; anti-PDGFR $\beta$ ab32570 ; anti-GFP GTX26673. |
| Validation      | Each of these antibodies are routinely used in the field. Each has been extensively used and validated by numerous studies by our group and others. This information is available online from the manufacturers for each.                       |

## Eukaryotic cell lines

Policy information about [cell lines](#)

|                                                                      |                                         |
|----------------------------------------------------------------------|-----------------------------------------|
| Cell line source(s)                                                  | LNCaP , HMVP2, RM1, MycCap              |
| Authentication                                                       | ATCC, cell culture, tumor growth assays |
| Mycoplasma contamination                                             | All lines are negative for mycoplasma   |
| Commonly misidentified lines<br>(See <a href="#">ICLAC</a> register) | N/A                                     |

## Animals and other organisms

Policy information about [studies involving animals](#); [ARRIVE guidelines](#) recommended for reporting animal research

|                         |                                                   |
|-------------------------|---------------------------------------------------|
| Laboratory animals      | C57BL/6 background mice, both sexes, various ages |
| Wild animals            | No wild animals involved.                         |
| Field-collected samples | No field-collected animals involved.              |
| Ethics oversight        | UTHealth Animal Care and Use Committee            |

Note that full information on the approval of the study protocol must also be provided in the manuscript.

## Human research participants

Policy information about [studies involving human research participants](#)

|                            |                                                                                                                                                                                                                                                |
|----------------------------|------------------------------------------------------------------------------------------------------------------------------------------------------------------------------------------------------------------------------------------------|
| Population characteristics | Males of various ages were included as published in our previous work Zhang T, et al. and Kolonin CXCL1 mediates obesity-associated adipose stromal cell trafficking and function in the tumor microenvironment. Nature Comm. 2016;7:11674-90. |
| Recruitment                | Described in our publication Zhang T, et al. and Kolonin CXCL1 mediates obesity-associated adipose stromal cell trafficking and function in the tumor microenvironment. Nature Comm. 2016.                                                     |
| Ethics oversight           | MD Anderson Cancer Center                                                                                                                                                                                                                      |

Note that full information on the approval of the study protocol must also be provided in the manuscript.

## Clinical data

Policy information about [clinical studies](#)

All manuscripts should comply with the ICMJE [guidelines for publication of clinical research](#) and a completed [CONSORT checklist](#) must be included with all submissions.

|                             |                                                             |
|-----------------------------|-------------------------------------------------------------|
| Clinical trial registration | N/A                                                         |
| Study protocol              | Not a clinical trial                                        |
| Data collection             | Adipose tissue samples were collected during prostatectomy. |
| Outcomes                    | Outcomes were not a part of the study.                      |
